# Supplementary material for: Enhanced preservation of the human intestinal microbiota by ridinilazole, a novel Clostridium difficile-targeting antibacterial, compared to vancomycin
Source: PubMed Central journal article supplement (PMC6071993; doi:10.1371/journal.pone.0199810), 2018-08-02
Supplement: pone.0199810.s006.pdf [file pone.0199810.s006.pdf]

**Bacteroides**

| CDI Rx 24 hrs prior to enrollment | Pretreatment Abx  | Study drug       | Subject ID# | Baseline (day 1) | Day 5           | End of treatment (day 10) | Day 25          | End of study (day 40) | Sample taken at time of suspected recurrence (REC) | Recurrence confirmed (yes/no) |
|-----------------------------------|-------------------|------------------|-------------|------------------|-----------------|---------------------------|-----------------|-----------------------|----------------------------------------------------|-------------------------------|
| Y                                 | Vancomycin (V)    | Ridinilazole (R) | 002-013     | 1.04E+11         | 2.33E+10        | 4.67E+10                  | 3.94E+10        | 2.30E+10              |                                                    |                               |
| Y                                 | Metrinidazole (M) | R                | 007-002     | 1.51E+05         | 8.49E+03        | 1.53E+04                  | 1.07E+05        | 1.35E+05              |                                                    |                               |
| Y                                 | V+M               | R                | 009-002     | 3.11E+09         | 2.19E+06        | 1.66E+09                  | 1.04E+07        | 2.62E+07              |                                                    |                               |
| Y                                 | M                 | R                | 017-003     | 1.72E+10         | 1.13E+10        | 2.06E+10                  |                 | 1.46E+10              |                                                    |                               |
| Y                                 | M                 | R                | 022-001     |                  | 1.63E+10        | 2.41E+10                  | 9.27E+09        | 1.01E+09              |                                                    |                               |
| Y                                 | V+M               | R                | 031-002     | 1.47E+10         |                 | 6.29E+10                  | 2.86E+06        |                       | 1.96E+07                                           | Yes                           |
| Y                                 | M                 | R                | 033-008     | 9.35E+09         | 5.09E+06        | 2.33E+06                  | 2.74E+05        | 9.74E+09              | 3.12E+05                                           | No                            |
| Y                                 | M                 | R                | 033-011     | 3.82E+06         | 7.02E+06        | 2.40E+10                  | 3.97E+10        | 8.23E+09              |                                                    |                               |
| Y                                 | V+M               | R                | 038-001     |                  | 3.20E+05        | 3.50E+09                  | 2.28E+10        | 2.55E+10              |                                                    |                               |
| Y                                 | V                 | R                | 038-004     | 1.28E+06         | 3.35E+05        | 1.85E+10                  | 4.75E+10        |                       |                                                    |                               |
| Y                                 | V                 | R                | 042-003     |                  | 6.79E+09        | 5.99E+09                  | 1.99E+10        | 2.75E+09              |                                                    |                               |
| Y                                 | M                 | R                | 045-003     | 5.55E+05         | 2.40E+06        | 2.60E+06                  | 1.15E+06        | 6.52E+05              |                                                    |                               |
| N                                 |                   | R                | 002-007     | 1.29E+09         | 1.65E+05        | 1.10E+09                  | 3.89E+06        | 1.28E+07              |                                                    |                               |
| N                                 |                   | R                | 002-009     | 6.15E+09         | 4.27E+08        | 3.15E+08                  | 3.92E+09        | 7.68E+09              |                                                    |                               |
| N                                 |                   | R                | 002-012     | 1.82E+10         | 4.06E+10        | 2.26E+10                  |                 |                       |                                                    |                               |
| N                                 |                   | R                | 009-005     | 7.46E+05         | 6.23E+04        | 1.38E+05                  | 5.88E+05        | 2.72E+10              |                                                    |                               |
| N                                 |                   | R                | 009-007     | 8.44E+06         | 1.88E+10        | 7.76E+09                  | 3.14E+10        | 2.36E+09              |                                                    |                               |
| N                                 |                   | R                | 019-001     | 3.61E+07         | 1.27E+08        | 1.31E+08                  | 1.60E+06        | 8.53E+05              |                                                    |                               |
| N                                 |                   | R                | 019-003     | 2.15E+09         | 1.19E+10        | 1.37E+10                  | 6.66E+09        | 3.66E+09              | 9.74E+09                                           | No                            |
| N                                 |                   | R                | 019-006     | 3.88E+09         | 4.37E+09        | 1.12E+10                  | 1.24E+10        | 2.63E+10              |                                                    |                               |
| N                                 |                   | R                | 019-007     | 3.83E+10         | 1.97E+10        | 1.76E+10                  | 4.10E+10        | 3.31E+10              |                                                    |                               |
| N                                 |                   | R                | 019-009     | 6.87E+09         | 1.48E+10        | 1.69E+10                  | 2.56E+10        | 3.75E+10              |                                                    |                               |
| N                                 |                   | R                | 021-001     | 7.81E+09         | 4.38E+09        | 1.45E+10                  | 5.08E+06        | 1.09E+10              | 4.11E+09                                           |                               |
| N                                 |                   | R                | 029-002     | 1.28E+10         | 6.37E+09        | 1.64E+09                  | 1.39E+10        | 2.02E+09              | 1.24E+10                                           | no                            |
| N                                 |                   | R                | 030-005     | 9.17E+09         | 2.29E+10        | 1.20E+10                  | 3.82E+09        | 3.99E+08              |                                                    |                               |
| N                                 |                   | R                | 031-001     | 8.83E+09         | 1.34E+10        | 1.15E+10                  |                 |                       |                                                    |                               |
| N                                 |                   | R                | 032-003     | 4.61E+09         | 1.78E+10        | 2.26E+06                  |                 |                       |                                                    | yes                           |
| N                                 |                   | R                | 033-009     | 7.83E+07         | 3.44E+10        | 1.40E+10                  | 5.49E+10        | 5.09E+10              |                                                    |                               |
| N                                 |                   | R                | 035-001     | 7.14E+09         | 2.64E+10        | 1.42E+10                  | 2.97E+10        | 4.82E+10              |                                                    |                               |
| N                                 |                   | R                | 036-001     | 3.98E+05         | 2.16E+07        | 4.18E+05                  | 2.84E+05        | 1.70E+10              |                                                    |                               |
| N                                 |                   | R                | 037-004     | 1.17E+10         | 2.22E+10        | 7.63E+09                  | 1.53E+10        | 1.02E+10              |                                                    |                               |
| N                                 |                   | R                | 037-008     | 6.21E+05         | 1.17E+06        | 4.73E+05                  | 5.56E+05        |                       |                                                    |                               |
| N                                 |                   | R                | 037-014     |                  | 4.68E+09        | 8.23E+08                  | 3.11E+05        | 3.36E+09              |                                                    |                               |
| N                                 |                   | R                | 037-015     | 1.08E+11         | 3.78E+09        | 2.33E+10                  | 4.97E+09        | 4.54E+09              |                                                    |                               |
| <b>Median</b>                     |                   |                  |             | <b>6.15E+09</b>  | <b>9.12E+09</b> | <b>9.47E+09</b>           | <b>4.97E+09</b> | <b>8.92E+09</b>       | <b>4.11E+09</b>                                    |                               |
| <b>Mean</b>                       |                   |                  |             | <b>1.17E+10</b>  | <b>1.21E+10</b> | <b>8.68E+09</b>           | <b>1.28E+10</b> | <b>1.59E+10</b>       |                                                    |                               |
| <b># of Samples</b>               |                   |                  |             | <b>21</b>        | <b>22</b>       | <b>22</b>                 | <b>19</b>       | <b>18</b>             | <b>5</b>                                           |                               |

| CDI Rx 24<br>hrs prior to<br>enrollment | Pretreatment<br>Abx | Study drug     | Sample ID# | Baseline<br>(day 1) | Day 5           | End of<br>treatment<br>(day 10) | Day 25          | End of study<br>(day 40) | Sample taken<br>at time of<br>suspected<br>recurrence | Recurrence<br>confirmed<br>(yes/no) |
|-----------------------------------------|---------------------|----------------|------------|---------------------|-----------------|---------------------------------|-----------------|--------------------------|-------------------------------------------------------|-------------------------------------|
| Y                                       | M                   | Vancomycin (V) | 002-014    | 2.08E+06            | 1.73E+06        | 1.38E+05                        |                 |                          |                                                       |                                     |
| Y                                       | V                   | V              | 007-001    | 1.60E+10            | 1.41E+07        | 6.96E+04                        | 9.67E+06        | 7.93E+09                 |                                                       |                                     |
| Y                                       | M                   | V              | 009-010    | 6.42E+09            | 5.30E+07        | 7.38E+06                        | 1.35E+06        | 1.67E+09                 |                                                       |                                     |
| Y                                       | M                   | V              | 019-004    | 1.24E+10            | 6.98E+06        | 4.19E+07                        | 7.67E+05        | 4.74E+05                 |                                                       |                                     |
| Y                                       | M                   | V              | 029-001    | 8.94E+07            | 4.77E+04        | 3.45E+04                        | 1.06E+06        | 2.64E+04                 |                                                       | yes                                 |
| Y                                       | M                   | V              | 029-004    | 3.49E+09            | 4.55E+05        | 1.54E+05                        | 2.14E+09        | 5.43E+09                 |                                                       |                                     |
| Y                                       | M                   | V              | 033-007    | 3.46E+08            | 8.67E+09        | 4.08E+09                        | 2.41E+09        |                          |                                                       |                                     |
| Y                                       | V+M                 | V              | 033-010    | 6.70E+09            | 3.89E+05        | 2.27E+06                        | 4.28E+05        | 1.26E+06                 | 3.44E+06                                              | yes                                 |
| Y                                       | M                   | V              | 035-003    | 4.27E+09            | 3.94E+07        | 3.77E+07                        | 5.35E+06        | 8.69E+08                 | 2.55E+10                                              | no                                  |
| Y                                       | V+M                 | V              | 045-001    | 1.08E+09            | 1.89E+05        | 1.13E+05                        |                 | 8.86E+09                 |                                                       |                                     |
| N                                       |                     | V              | 002-004    | 2.53E+10            | 1.07E+06        | 4.22E+05                        | 1.26E+06        |                          | 6.06E+05                                              | yes                                 |
| N                                       |                     | V              | 002-011    | 2.37E+08            | 3.37E+05        | 1.46E+05                        | 4.65E+08        | 1.22E+09                 |                                                       |                                     |
| N                                       |                     | V              | 002-015    | 8.90E+09            | 2.30E+06        | 7.23E+05                        |                 |                          | 1.36E+06                                              | Yes                                 |
| N                                       |                     | V              | 002-016    | 4.20E+06            | 6.21E+06        | 1.48E+06                        |                 |                          |                                                       | yes                                 |
| N                                       |                     | V              | 009-001    | 1.64E+05            | 3.33E+05        | 2.94E+05                        | 1.36E+05        | 1.00E+07                 |                                                       |                                     |
| N                                       |                     | V              | 009-003    | 1.17E+08            | 3.04E+07        | 1.18E+06                        | 4.38E+09        | 2.23E+09                 | 1.21E+10                                              | no                                  |
| N                                       |                     | V              | 009-004    | 4.03E+09            | 1.21E+05        | 1.16E+05                        | 3.59E+09        |                          |                                                       |                                     |
| N                                       |                     | V              | 009-006    | 8.52E+09            | 3.07E+05        | 9.74E+04                        | 2.62E+06        | 2.34E+06                 |                                                       |                                     |
| N                                       |                     | V              | 017-002    | 1.71E+09            | 5.91E+06        | 1.32E+06                        | 7.93E+09        | 2.82E+10                 |                                                       |                                     |
| N                                       |                     | V              | 019-005    | 1.42E+10            | 7.64E+05        | 1.25E+06                        | 1.27E+10        | 1.81E+10                 |                                                       |                                     |
| N                                       |                     | V              | 019-008    | 1.64E+10            | 3.27E+06        | 6.72E+06                        | 1.53E+09        | 1.73E+10                 |                                                       |                                     |
| N                                       |                     | V              | 019-010    |                     | 4.60E+07        | 4.50E+05                        | 2.37E+09        | 1.66E+10                 |                                                       |                                     |
| N                                       |                     | V              | 019-013    | 2.40E+10            | 5.52E+05        | 8.38E+09                        | 1.31E+06        | 5.97E+10                 |                                                       |                                     |
| N                                       |                     | V              | 019-014    | 1.69E+09            | 1.14E+05        | 3.13E+05                        | 1.64E+08        | 3.83E+08                 |                                                       |                                     |
| N                                       |                     | V              | 021-003    | 1.33E+10            |                 | 3.99E+06                        | 1.89E+10        |                          | 2.70E+10                                              | Yes                                 |
| N                                       |                     | V              | 030-004    | 5.48E+10            | 2.50E+07        | 2.20E+06                        |                 | 2.69E+10                 |                                                       |                                     |
| N                                       |                     | V              | 035-002    | 1.05E+10            | 9.77E+05        | 1.14E+06                        |                 |                          | 1.23E+06                                              | Yes                                 |
| N                                       |                     | V              | 037-006    |                     | 1.94E+06        | 4.74E+05                        | 7.07E+05        |                          |                                                       | yes                                 |
| N                                       |                     | V              | 037-010    | 9.86E+05            | 9.68E+04        | 1.56E+05                        | 9.52E+05        |                          |                                                       | no                                  |
| N                                       |                     | V              | 037-016    |                     | 1.15E+06        | 1.38E+06                        | 4.90E+08        | 6.28E+08                 | 2.27E+08                                              | no                                  |
| N                                       |                     | V              | 042-001    | 3.57E+09            | 2.79E+07        | 1.35E+06                        |                 |                          |                                                       | no                                  |
| N                                       |                     | V              | 042-002    | 1.65E+10            | 3.05E+07        | 2.25E+05                        | 1.54E+10        |                          |                                                       |                                     |
| <b>Median</b>                           |                     |                |            | <b>8.52E+09</b>     | <b>1.15E+06</b> | <b>9.32E+05</b>                 | <b>4.90E+08</b> | <b>9.43E+09</b>          | <b>1.14E+08</b>                                       |                                     |
| <b>Mean</b>                             |                     |                |            | <b>1.07E+10</b>     | <b>8.82E+06</b> | <b>3.82E+08</b>                 | <b>3.99E+09</b> | <b>1.43E+10</b>          | <b>6.55E+09</b>                                       |                                     |
| <b># of Samples</b>                     |                     |                |            | <b>19</b>           | <b>21</b>       | <b>22</b>                       | <b>17</b>       | <b>12</b>                | <b>6</b>                                              |                                     |

## Eubacteria

| Study drug       | Subject ID# | Baseline (day 1) | Day 5    | End of treatment (day 10) | Day 25   | End of study (day 40) | Sample taken at time of suspected recurrence (REC) |
|------------------|-------------|------------------|----------|---------------------------|----------|-----------------------|----------------------------------------------------|
| Ridinilazole (R) | 002-013     | 7.84E+10         | 1.25E+10 | 3.07E+10                  | 3.59E+10 | 2.75E+10              |                                                    |
| R                | 007-002     | 7.10E+08         | 7.80E+04 | 5.90E+05                  | 2.83E+09 | 6.35E+08              |                                                    |
| R                | 009-002     | 8.05E+09         | 6.26E+08 | 5.46E+10                  | 2.32E+09 | 1.22E+10              |                                                    |
| R                | 017-003     | 2.27E+10         | 1.04E+10 | 1.45E+10                  |          | 1.38E+10              |                                                    |
| R                | 022-001     |                  | 1.32E+10 | 1.58E+10                  | 3.33E+09 | 5.24E+08              |                                                    |
| R                | 031-002     | 1.26E+10         |          | 3.74E+10                  | 6.58E+07 |                       | 5.69E+09                                           |
| R                | 033-008     | 5.45E+09         | 1.38E+09 | 9.67E+06                  |          |                       |                                                    |
| R                | 033-011     | 2.93E+07         | 2.02E+07 | 1.36E+10                  | 3.09E+10 | 8.17E+08              |                                                    |
| R                | 038-001     |                  | 2.46E+08 | 9.24E+09                  | 1.90E+10 | 1.86E+10              |                                                    |
| R                | 038-004     | 1.21E+07         | 5.01E+07 | 2.25E+07                  | 3.52E+08 |                       |                                                    |
| R                | 042-003     |                  | 6.35E+09 | 4.93E+09                  |          |                       |                                                    |
| R                | 045-003     | 6.88E+08         | 3.16E+09 | 1.26E+10                  | 1.66E+10 | 7.74E+09              |                                                    |
| R                | 002-007     | 1.42E+09         | 5.05E+07 | 2.24E+10                  | 4.91E+08 | 5.60E+09              |                                                    |
| R                | 002-009     | 7.83E+09         | 4.45E+08 | 4.45E+08                  | 5.12E+09 | 1.10E+10              |                                                    |
| R                | 002-012     | 2.74E+10         | 5.02E+10 | 1.25E+10                  |          |                       |                                                    |
| R                | 009-005     | 7.54E+09         | 3.59E+08 | 3.52E+09                  | 9.36E+09 | 1.13E+10              |                                                    |
| R                | 009-007     | 6.25E+08         | 1.65E+10 | 6.03E+09                  | 1.14E+10 | 3.32E+09              |                                                    |
| R                | 019-001     | 6.68E+09         | 9.80E+09 | 6.79E+09                  | 4.52E+08 | 1.56E+09              |                                                    |
| R                | 019-003     | 2.41E+09         | 1.02E+10 | 1.45E+10                  | 6.21E+09 | 1.99E+09              | 1.85E+10                                           |
| R                | 019-006     | 4.92E+09         | 3.44E+09 | 8.32E+09                  | 8.14E+09 | 1.48E+10              |                                                    |
| R                | 019-007     | 2.31E+10         | 7.35E+09 | 7.60E+09                  | 2.16E+10 | 2.01E+10              |                                                    |
| R                | 019-009     | 1.01E+10         | 5.73E+09 | 5.47E+09                  | 1.33E+10 | 1.95E+10              |                                                    |
| R                | 021-001     | 7.56E+09         | 4.25E+09 | 9.59E+09                  | 3.47E+08 | 9.10E+09              | 4.76E+09                                           |
| R                | 029-002     | 1.77E+10         | 1.02E+10 | 2.46E+09                  | 2.89E+10 | 2.81E+09              | 1.06E+10                                           |
| R                | 030-005     | 5.41E+09         | 1.09E+10 | 7.87E+09                  | 2.14E+09 | 2.66E+08              |                                                    |
| R                | 031-001     | 1.43E+10         | 2.85E+10 | 2.05E+10                  |          |                       |                                                    |
| R                | 032-003     | 2.56E+09         | 1.11E+10 | 4.67E+08                  |          |                       |                                                    |

|                     |         |                 |                 |                 |                 |                 |                 |
|---------------------|---------|-----------------|-----------------|-----------------|-----------------|-----------------|-----------------|
| R                   | 033-009 | 2.52E+07        | 1.57E+10        | 7.75E+09        | 2.71E+10        | 1.18E+10        |                 |
| R                   | 035-001 | 2.87E+09        | 6.75E+09        | 6.98E+09        | 1.80E+10        | 2.33E+10        |                 |
| R                   | 036-001 | 5.48E+09        | 4.06E+06        | 5.52E+08        | 2.97E+09        | 1.10E+10        |                 |
| R                   | 037-004 | 4.53E+09        | 5.42E+09        | 2.28E+09        | 5.52E+09        | 3.65E+09        |                 |
| R                   | 037-008 | 3.08E+09        | 1.50E+10        | 3.85E+09        | 1.33E+10        |                 |                 |
| R                   | 037-014 |                 | 1.62E+09        | 6.44E+08        | 6.61E+08        | 5.36E+09        |                 |
| R                   | 037-015 | 1.10E+11        | 2.51E+09        | 9.88E+09        | 2.71E+09        | 3.65E+09        |                 |
| <b>Median</b>       |         | <b>5.48E+09</b> | <b>7.05E+09</b> | <b>6.88E+09</b> | <b>6.21E+09</b> | <b>7.35E+09</b> | <b>8.15E+09</b> |
| <b>Mean</b>         |         | <b>1.27E+10</b> | <b>9.83E+09</b> | <b>7.29E+09</b> | <b>9.36E+09</b> | <b>8.89E+09</b> | <b>1.13E+10</b> |
| <b># of Samples</b> |         | <b>21</b>       | <b>22</b>       | <b>22</b>       | <b>19</b>       | <b>18</b>       | <b>3</b>        |
| V                   | 002-014 | 1.37E+09        | 2.37E+09        | 6.92E+08        |                 |                 |                 |
| V                   | 007-001 | 1.50E+10        | 5.27E+08        | 2.67E+08        | 3.20E+09        | 6.21E+09        |                 |
| V                   | 009-010 | 1.96E+10        | 2.00E+09        | 1.82E+09        | 3.24E+09        | 4.07E+09        |                 |
| V                   | 019-004 | 6.86E+09        | 1.32E+09        |                 |                 |                 |                 |
| V                   | 029-001 | 6.22E+07        | 7.12E+06        | 2.12E+06        | 5.61E+08        | 1.30E+07        |                 |
| V                   | 029-004 | 3.34E+09        | 7.63E+08        | 2.22E+09        | 1.08E+10        | 2.22E+10        |                 |
| V                   | 033-007 | 1.59E+08        | 3.78E+09        | 1.57E+09        | 1.09E+09        |                 |                 |
| V                   | 033-010 | 2.30E+09        | 2.16E+08        | 3.61E+08        |                 |                 | 5.59E+09        |
| V                   | 035-003 | 8.05E+09        | 6.07E+08        | 1.56E+09        |                 |                 | 2.90E+10        |
| V                   | 045-001 | 1.26E+09        | 1.55E+07        | 2.63E+07        |                 | 8.58E+09        |                 |
| V                   | 002-004 | 1.72E+10        | 5.27E+07        | 7.06E+07        | 1.21E+09        |                 | 6.43E+08        |
| V                   | 002-011 | 2.69E+09        | 1.12E+09        | 7.91E+08        | 4.27E+09        | 1.55E+09        |                 |
| V                   | 002-015 | 1.22E+10        | 1.47E+08        | 4.68E+08        |                 |                 | 4.32E+09        |
| V                   | 002-016 | 2.59E+09        | 7.25E+09        | 5.06E+09        |                 |                 |                 |
| V                   | 009-001 | 4.82E+09        | 2.18E+09        | 2.11E+09        | 3.00E+09        | 5.16E+09        |                 |
| V                   | 009-003 | 7.71E+08        | 4.27E+09        | 1.81E+09        | 4.89E+09        | 1.63E+09        | 6.61E+09        |
| V                   | 009-004 | 1.50E+09        | 2.75E+08        | 4.69E+08        | 5.55E+09        |                 |                 |
| V                   | 009-006 | 5.80E+09        | 1.51E+07        | 1.63E+07        | 2.53E+09        | 2.49E+09        |                 |
| V                   | 017-002 | 2.30E+09        | 1.93E+09        | 6.00E+08        | 6.61E+09        | 2.54E+10        |                 |
| V                   | 019-005 | 1.08E+10        | 3.00E+08        | 2.56E+07        | 6.17E+09        | 8.24E+09        |                 |
| V                   | 019-008 | 9.88E+09        | 6.75E+08        | 7.76E+08        | 8.24E+09        | 9.34E+09        |                 |
| V                   | 019-010 |                 | 3.40E+09        | 4.46E+08        | 1.52E+09        | 2.16E+10        |                 |

|                     |         |                 |                 |                 |                 |                 |                 |
|---------------------|---------|-----------------|-----------------|-----------------|-----------------|-----------------|-----------------|
| V                   | 019-013 | 2.44E+10        | 1.25E+09        | 6.18E+09        | 1.52E+10        | 5.54E+10        |                 |
| V                   | 019-014 | 5.00E+07        | 2.19E+08        | 2.87E+09        | 1.34E+09        | 2.03E+09        |                 |
| V                   | 021-003 | 1.30E+10        |                 | 1.44E+10        | 1.93E+10        |                 | 2.52E+10        |
| V                   | 030-004 | 6.11E+10        | 3.44E+09        | 2.92E+09        |                 | 2.85E+10        |                 |
| V                   | 035-002 | 5.74E+09        | 1.95E+09        | 1.22E+09        |                 |                 | 6.95E+09        |
| V                   | 037-006 |                 | 4.98E+09        | 6.92E+09        | 1.83E+09        |                 |                 |
| V                   | 037-010 | 1.31E+10        | 7.79E+09        | 6.36E+09        | 9.08E+09        |                 |                 |
| V                   | 037-016 |                 | 3.87E+08        | 4.77E+08        | 6.99E+09        | 5.94E+09        | 3.08E+10        |
| V                   | 042-001 | 1.91E+09        | 3.14E+09        | 5.31E+09        |                 |                 |                 |
| V                   | 042-002 | 5.45E+09        | 9.70E+09        | 2.44E+09        | 2.99E+10        |                 |                 |
| <b>Median</b>       |         | <b>5.74E+09</b> | <b>1.93E+09</b> | <b>1.51E+09</b> | <b>5.55E+09</b> | <b>7.09E+09</b> | <b>6.78E+09</b> |
| <b>Mean</b>         |         | <b>1.03E+10</b> | <b>2.59E+09</b> | <b>2.80E+09</b> | <b>7.51E+09</b> | <b>1.39E+10</b> | <b>1.24E+10</b> |
| <b># of Samples</b> |         | <b>19</b>       | <b>21</b>       | <b>22</b>       | <b>17</b>       | <b>12</b>       | <b>6</b>        |

## Enterobacteriaceae

| Study drug       | Subject ID# | Baseline<br>(day 1) | Day 5    | End of<br>treatment<br>(day 10) | Day 25   | End of<br>study (day<br>40) | Sample<br>taken at<br>time of<br>suspected<br>recurrence<br>(REC) |
|------------------|-------------|---------------------|----------|---------------------------------|----------|-----------------------------|-------------------------------------------------------------------|
| Ridinilazole (R) | 002-013     | 2.56E+09            | 1.52E+09 | 1.91E+08                        | 1.40E+10 | 6.00E+06                    |                                                                   |
| R                | 007-002     | 7.14E+08            | 8.49E+03 | 1.18E+04                        | 7.33E+05 | 1.26E+07                    |                                                                   |
| R                | 009-002     | 1.04E+09            | 6.28E+05 | 9.10E+08                        | 8.71E+07 | 1.95E+09                    |                                                                   |
| R                | 017-003     | 9.91E+07            | 1.91E+06 | 1.32E+07                        |          | 5.34E+05                    |                                                                   |
| R                | 022-001     |                     | 3.78E+08 | 1.13E+07                        | 6.63E+07 | 3.33E+07                    |                                                                   |
| R                | 031-002     | 5.39E+05            |          | 1.16E+06                        | 2.74E+04 |                             | 1.27E+06                                                          |
| R                | 033-008     | 5.82E+07            | 1.54E+09 | 6.93E+06                        |          |                             | 1.83E+06                                                          |
| R                | 033-011     | 1.20E+09            | 9.18E+08 | 1.17E+09                        | 1.60E+08 | 6.51E+08                    |                                                                   |
| R                | 038-001     |                     | 2.11E+05 | 1.44E+06                        | 2.15E+06 | 9.56E+07                    |                                                                   |
| R                | 038-004     | 9.68E+05            | 2.10E+08 | 1.35E+08                        | 2.83E+06 |                             |                                                                   |
| R                | 042-003     |                     | 2.12E+08 | 1.81E+06                        |          |                             |                                                                   |
| R                | 045-003     | 4.49E+09            | 9.55E+08 | 7.75E+08                        | 1.86E+08 | 9.31E+07                    |                                                                   |
| R                | 002-007     | 4.49E+08            | 1.48E+05 | 4.99E+08                        | 2.90E+07 | 8.08E+08                    |                                                                   |
| R                | 002-009     | 1.81E+07            | 1.79E+07 | 3.85E+05                        | 2.91E+05 | 2.31E+05                    |                                                                   |
| R                | 002-012     | 3.92E+09            | 8.71E+08 | 8.17E+08                        |          |                             |                                                                   |
| R                | 009-005     | 2.96E+09            | 7.72E+08 | 1.26E+09                        | 3.90E+09 | 1.88E+09                    |                                                                   |
| R                | 009-007     | 1.90E+04            | 1.09E+05 | 5.09E+04                        | 5.63E+04 | 3.27E+04                    |                                                                   |
| R                | 019-001     | 1.91E+08            | 1.65E+09 | 4.81E+08                        | 5.64E+08 | 2.21E+09                    |                                                                   |
| R                | 019-003     | 1.65E+08            | 9.08E+08 | 1.59E+08                        | 4.83E+09 | 1.42E+06                    | 2.15E+07                                                          |
| R                | 019-006     | 6.30E+05            | 1.18E+08 | 1.33E+08                        | 1.49E+06 | 1.63E+07                    |                                                                   |
| R                | 019-007     | 6.00E+05            | 3.05E+05 | 1.77E+05                        | 1.05E+06 | 1.61E+06                    |                                                                   |
| R                | 019-009     | 9.94E+08            | 8.96E+08 | 4.28E+08                        | 1.58E+08 | 2.19E+07                    |                                                                   |
| R                | 021-001     | 4.56E+05            | 1.85E+05 | 7.45E+05                        | 2.28E+08 | 1.74E+08                    | 1.18E+07                                                          |
| R                | 029-002     | 8.89E+06            | 2.32E+08 | 3.34E+06                        | 8.07E+07 | 3.74E+08                    | 2.67E+08                                                          |
| R                | 030-005     | 1.55E+05            | 5.11E+05 | 5.18E+07                        | 2.76E+07 | 1.20E+07                    |                                                                   |
| R                | 031-001     | 8.65E+05            | 9.03E+05 | 3.93E+05                        |          |                             |                                                                   |
| R                | 032-003     | 4.63E+08            | 9.38E+08 | 4.01E+08                        |          |                             |                                                                   |

|                     |         |                 |                 |                 |                 |                 |                 |
|---------------------|---------|-----------------|-----------------|-----------------|-----------------|-----------------|-----------------|
| R                   | 033-009 | 1.59E+09        | 6.64E+09        | 1.06E+09        | 7.69E+08        | 1.89E+08        |                 |
| R                   | 035-001 | 6.98E+07        | 2.93E+07        | 1.13E+07        | 1.00E+06        | 7.38E+06        |                 |
| R                   | 036-001 | 1.69E+08        | 3.86E+07        | 8.27E+08        | 7.46E+07        | 1.28E+07        |                 |
| R                   | 037-004 | 2.43E+07        | 3.21E+08        | 1.69E+08        | 2.09E+07        | 2.81E+08        |                 |
| R                   | 037-008 | 4.06E+08        | 7.87E+08        | 2.65E+09        | 2.45E+07        |                 |                 |
| R                   | 037-014 |                 | 1.27E+06        | 4.56E+05        | 2.76E+08        | 3.12E+07        |                 |
| R                   | 037-015 | 5.08E+07        | 4.61E+07        | 8.59E+08        | 1.42E+08        | 2.38E+08        |                 |
| <b>Median</b>       |         | <b>6.98E+07</b> | <b>8.19E+07</b> | <b>1.64E+08</b> | <b>7.46E+07</b> | <b>2.65E+07</b> | <b>1.18E+07</b> |
| <b>Mean</b>         |         | <b>5.47E+08</b> | <b>6.49E+08</b> | <b>4.46E+08</b> | <b>5.86E+08</b> | <b>3.47E+08</b> |                 |
| <b># of Samples</b> |         | <b>21</b>       | <b>22</b>       | <b>22</b>       | <b>19</b>       | <b>18</b>       |                 |
| V                   | 002-014 | 3.52E+06        | 6.33E+07        | 7.83E+05        |                 |                 |                 |
| V                   | 007-001 | 8.26E+08        | 8.39E+08        | 4.15E+08        | 1.65E+09        | 4.40E+08        |                 |
| V                   | 009-010 | 2.62E+09        | 7.11E+08        | 8.87E+08        | 3.62E+08        | 3.87E+07        |                 |
| V                   | 019-004 | 1.01E+09        | 2.63E+09        | 3.56E+09        |                 |                 |                 |
| V                   | 029-001 | 6.68E+08        | 4.49E+08        | 2.67E+08        | 1.03E+09        |                 |                 |
| V                   | 029-004 | 3.62E+07        | 8.30E+05        | 2.59E+08        | 3.52E+07        | 7.52E+07        |                 |
| V                   | 033-007 | 3.20E+08        | 3.02E+08        | 1.67E+08        | 6.84E+08        |                 |                 |
| V                   | 033-010 | 7.38E+09        | 1.84E+08        | 1.03E+08        |                 |                 | 1.39E+09        |
| V                   | 035-003 | 6.32E+08        | 4.12E+08        | 5.46E+08        |                 |                 | 6.70E+08        |
| V                   | 045-001 | 1.32E+05        | 9.20E+03        | 2.67E+04        |                 | 6.89E+07        |                 |
| V                   | 002-004 | 1.08E+06        | 2.28E+07        | 7.55E+07        | 2.12E+08        |                 | 5.20E+08        |
| V                   | 002-011 | 5.80E+08        | 1.42E+09        | 6.89E+08        | 1.59E+09        | 1.93E+09        |                 |
| V                   | 002-015 | 1.26E+08        | 3.13E+08        | 1.60E+09        |                 |                 | 1.48E+09        |
| V                   | 002-016 | 2.63E+06        | 1.15E+08        | 5.21E+07        |                 |                 |                 |
| V                   | 009-001 | 6.20E+07        | 2.13E+08        | 1.99E+08        | 7.50E+07        | 7.16E+06        |                 |
| V                   | 009-003 | 2.79E+06        | 9.94E+08        | 5.38E+08        | 6.90E+07        | 1.39E+08        | 7.81E+07        |
| V                   | 009-004 | 3.53E+08        | 3.41E+08        | 7.47E+08        | 2.00E+09        |                 |                 |
| V                   | 009-006 | 1.81E+05        | 6.55E+06        | 1.74E+07        | 4.42E+08        | 2.01E+09        |                 |
| V                   | 017-002 | 8.72E+08        | 6.86E+08        | 9.55E+08        | 5.21E+08        | 3.16E+06        |                 |
| V                   | 019-005 | 3.48E+08        | 8.93E+08        | 1.12E+09        | 2.07E+09        | 6.53E+08        |                 |
| V                   | 019-008 | 5.93E+05        | 2.22E+07        | 5.10E+05        | 4.28E+08        | 9.53E+07        |                 |
| V                   | 019-010 |                 | 4.63E+07        | 7.98E+07        | 1.73E+05        | 4.75E+08        |                 |

|   |                     |                 |                 |                 |                 |                 |                 |
|---|---------------------|-----------------|-----------------|-----------------|-----------------|-----------------|-----------------|
| V | 019-013             | 3.11E+05        | 4.03E+08        | 2.17E+08        | 1.56E+08        | 1.22E+08        |                 |
| V | 019-014             | 1.15E+07        | 3.80E+08        | 8.01E+08        | 1.73E+08        | 5.66E+08        |                 |
| V | 021-003             | 9.74E+05        |                 | 1.60E+06        | 1.93E+09        |                 | 1.44E+09        |
| V | 030-004             | 3.46E+08        | 1.60E+09        | 1.55E+09        |                 | 3.78E+07        |                 |
| V | 035-002             | 3.38E+07        | 5.27E+07        | 1.35E+07        |                 |                 | 4.71E+08        |
| V | 037-006             |                 | 1.54E+06        | 7.46E+05        | 5.54E+05        |                 |                 |
| V | 037-010             | 5.95E+08        | 7.74E+08        | 1.67E+09        | 4.47E+09        |                 |                 |
| V | 037-016             |                 | 3.30E+07        | 8.15E+07        | 5.45E+07        | 1.61E+06        | 9.79E+06        |
| V | 042-001             | 4.95E+05        | 3.11E+08        | 3.42E+08        |                 |                 |                 |
| V | 042-002             | 5.70E+08        | 6.50E+08        | 6.99E+08        | 1.52E+06        |                 |                 |
|   | <b>Median</b>       | <b>3.38E+07</b> | <b>3.13E+08</b> | <b>2.79E+08</b> | <b>2.12E+08</b> | <b>1.30E+08</b> | <b>4.95E+08</b> |
|   | <b>Mean</b>         | <b>2.06E+08</b> | <b>4.42E+08</b> | <b>5.21E+08</b> | <b>8.36E+08</b> | <b>5.03E+08</b> | <b>6.67E+08</b> |
|   | <b># of Samples</b> | <b>19</b>       | <b>21</b>       | <b>22</b>       | <b>17</b>       | <b>12</b>       | <b>6</b>        |



**C. coccoides**

| Study drug       | Subject ID# | Baseline<br>(day 1) | Day 5    | End of<br>treatment<br>(day 10) | Day 25   | End of<br>study (day<br>40) | Sample<br>taken at<br>time of<br>suspected<br>recurrence<br>(REC) |
|------------------|-------------|---------------------|----------|---------------------------------|----------|-----------------------------|-------------------------------------------------------------------|
| Ridinilazole (R) | 002-013     | 3.08E+09            | 1.22E+08 | 6.67E+08                        | 2.98E+08 | 2.15E+09                    |                                                                   |
| R                | 007-002     | 3.29E+06            | 1.39E+04 | 1.80E+04                        | 5.16E+05 | 6.64E+08                    |                                                                   |
| R                | 009-002     | 6.38E+08            | 1.90E+06 | 4.40E+08                        | 4.90E+08 | 3.74E+09                    |                                                                   |
| R                | 017-003     | 3.21E+09            | 1.70E+09 | 2.47E+09                        |          | 3.10E+09                    |                                                                   |
| R                | 022-001     |                     | 9.78E+08 | 1.66E+09                        | 1.11E+09 | 2.46E+08                    |                                                                   |
| R                | 031-002     | 2.78E+09            |          | 4.93E+09                        | 1.55E+05 |                             | 2.66E+07                                                          |
| R                | 033-008     | 4.44E+08            | 2.36E+08 | 4.75E+06                        |          |                             | 7.53E+05                                                          |
| R                | 033-011     | 7.16E+05            | 3.38E+05 | 5.87E+07                        | 3.05E+09 | 2.32E+09                    |                                                                   |
| R                | 038-001     |                     | 9.48E+05 | 4.67E+09                        | 8.34E+09 | 3.35E+09                    |                                                                   |
| R                | 038-004     | 5.23E+06            | 2.32E+07 | 8.23E+05                        | 1.56E+08 |                             |                                                                   |
| R                | 042-003     |                     | 2.77E+08 | 2.44E+08                        |          |                             |                                                                   |
| R                | 045-003     | 5.55E+05            | 2.75E+05 | 6.14E+09                        | 9.23E+09 | 3.48E+09                    |                                                                   |
| R                | 002-007     | 2.21E+08            | 3.20E+05 | 1.94E+08                        | 1.70E+08 | 1.58E+09                    |                                                                   |
| R                | 002-009     | 4.55E+08            | 1.06E+07 | 9.39E+07                        | 9.80E+08 | 1.93E+09                    |                                                                   |
| R                | 002-012     | 3.10E+09            | 4.08E+09 | 2.47E+09                        |          |                             |                                                                   |
| R                | 009-005     | 3.48E+09            | 2.06E+08 | 1.79E+09                        | 7.51E+09 | 9.00E+09                    |                                                                   |
| R                | 009-007     | 6.78E+07            | 1.82E+09 | 1.59E+09                        | 1.89E+09 | 2.94E+09                    |                                                                   |
| R                | 019-001     | 2.41E+08            | 3.63E+08 | 9.71E+08                        | 1.60E+06 | 8.53E+05                    |                                                                   |
| R                | 019-003     | 1.98E+08            | 7.32E+07 | 5.57E+08                        | 1.03E+08 | 5.09E+08                    | 1.87E+09                                                          |
| R                | 019-006     | 1.08E+09            | 3.70E+08 | 5.99E+08                        | 2.75E+09 | 2.46E+09                    |                                                                   |
| R                | 019-007     | 6.36E+09            | 1.12E+09 | 8.60E+08                        | 6.82E+09 | 4.88E+09                    |                                                                   |
| R                | 019-009     | 6.79E+09            | 2.02E+09 | 2.07E+09                        | 7.23E+09 | 3.91E+09                    |                                                                   |
| R                | 021-001     | 1.97E+09            | 4.11E+08 | 1.37E+09                        | 5.38E+06 | 7.96E+08                    | 1.83E+09                                                          |
| R                | 029-002     | 7.68E+09            | 1.93E+09 | 5.00E+08                        | 1.51E+10 | 1.65E+09                    | 4.04E+09                                                          |
| R                | 030-005     | 2.25E+08            | 9.16E+08 | 4.66E+08                        | 2.26E+08 | 2.47E+08                    |                                                                   |
| R                | 031-001     | 9.14E+08            | 6.93E+08 | 1.97E+08                        |          |                             |                                                                   |
| R                | 032-003     | 4.06E+05            | 3.06E+05 | 1.60E+05                        |          |                             |                                                                   |

|                     |         |                 |                 |                 |                 |                 |                 |
|---------------------|---------|-----------------|-----------------|-----------------|-----------------|-----------------|-----------------|
| R                   | 033-009 | 6.97E+06        | 7.50E+08        | 7.67E+08        | 4.64E+09        | 5.35E+09        |                 |
| R                   | 035-001 | 5.82E+08        | 1.62E+08        | 2.13E+08        | 1.86E+09        | 1.70E+10        |                 |
| R                   | 036-001 | 7.08E+09        | 8.96E+07        | 5.15E+08        | 1.80E+09        | 1.01E+09        |                 |
| R                   | 037-004 | 7.28E+08        | 3.63E+08        | 7.20E+07        | 2.81E+09        | 3.94E+09        |                 |
| R                   | 037-008 | 1.19E+09        | 8.90E+09        | 1.91E+09        | 6.58E+09        |                 |                 |
| R                   | 037-014 |                 | 1.32E+09        | 6.62E+08        | 6.07E+07        | 2.37E+09        |                 |
| R                   | 037-015 | 7.07E+09        | 9.59E+08        | 3.17E+08        | 1.01E+09        | 1.66E+09        |                 |
| <b>Median</b>       |         | <b>9.14E+08</b> | <b>5.52E+08</b> | <b>5.78E+08</b> | <b>1.86E+09</b> | <b>2.15E+09</b> | <b>1.83E+09</b> |
| <b>Mean</b>         |         | <b>2.35E+09</b> | <b>1.21E+09</b> | <b>8.27E+08</b> | <b>3.24E+09</b> | <b>3.40E+09</b> | <b>2.58E+09</b> |
| <b># of samples</b> |         | <b>21</b>       | <b>22</b>       | <b>22</b>       | <b>19</b>       | <b>18</b>       | <b>3</b>        |
| V                   | 002-014 | 6.09E+06        | 1.55E+07        | 2.47E+08        |                 |                 |                 |
| V                   | 007-001 | 9.17E+08        | 1.06E+06        | 2.23E+05        | 4.98E+08        | 2.06E+09        |                 |
| V                   | 009-010 | 4.13E+06        | 9.30E+05        | 1.37E+06        | 1.90E+09        | 8.50E+08        |                 |
| V                   | 019-004 | 1.62E+09        | 2.41E+06        | 9.32E+06        |                 |                 |                 |
| V                   | 029-001 | 2.68E+07        | 3.30E+06        | 7.75E+04        | 2.49E+08        | 5.70E+05        |                 |
| V                   | 029-004 | 2.05E+08        | 9.56E+05        | 3.78E+07        | 4.55E+09        | 6.05E+09        |                 |
| V                   | 033-007 | 1.96E+07        | 1.73E+08        | 4.63E+07        | 1.52E+08        |                 |                 |
| V                   | 033-010 | 3.14E+08        | 1.15E+06        | 2.95E+05        | 1.86E+05        | 7.13E+05        | 1.66E+09        |
| V                   | 035-003 | 1.06E+09        | 4.21E+06        | 1.24E+07        | 7.64E+05        | 1.69E+08        | 5.12E+09        |
| V                   | 045-001 | 3.70E+08        | 1.69E+05        | 2.51E+05        |                 | 3.09E+09        |                 |
| V                   | 002-004 | 4.38E+09        | 5.35E+05        | 5.75E+05        | 9.06E+08        |                 | 8.05E+08        |
| V                   | 002-011 | 1.82E+09        | 6.32E+05        | 3.32E+05        | 5.46E+09        | 4.59E+09        |                 |
| V                   | 002-015 | 5.18E+09        | 4.02E+06        | 1.89E+06        |                 |                 | 5.65E+08        |
| V                   | 002-016 | 2.27E+08        | 8.70E+07        | 2.68E+06        |                 |                 |                 |
| V                   | 009-001 | 1.75E+09        | 1.36E+06        | 1.13E+05        | 1.83E+08        | 7.02E+08        |                 |
| V                   | 009-003 | 9.68E+06        | 1.23E+07        | 1.94E+06        | 8.89E+08        | 3.25E+08        | 7.94E+08        |
| V                   | 009-004 | 3.35E+08        | 2.46E+05        | 1.07E+05        | 1.18E+09        |                 |                 |
| V                   | 009-006 | 1.48E+09        | 1.53E+05        | 1.33E+05        | 1.89E+09        | 3.11E+09        |                 |
| V                   | 017-002 | 1.13E+09        | 1.91E+06        | 8.69E+05        | 2.90E+09        | 3.73E+09        |                 |
| V                   | 019-005 | 1.89E+09        | 8.33E+05        | 4.75E+05        | 9.67E+08        | 4.63E+09        |                 |
| V                   | 019-008 | 1.31E+09        | 1.57E+06        | 4.11E+06        | 1.29E+09        | 3.92E+08        |                 |
| V                   | 019-010 |                 | 6.47E+06        | 3.57E+05        | 3.36E+08        | 5.73E+09        |                 |

|   |                     |                 |                 |                 |                 |                 |                 |
|---|---------------------|-----------------|-----------------|-----------------|-----------------|-----------------|-----------------|
| V | 019-013             | 2.31E+09        | 1.97E+06        | 3.48E+08        | 9.00E+09        | 2.84E+09        |                 |
| V | 019-014             | 9.12E+08        | 3.84E+05        | 4.06E+06        | 8.64E+08        | 1.52E+09        |                 |
| V | 021-003             | 4.76E+09        |                 | 1.08E+07        | 8.53E+08        |                 | 1.33E+10        |
| V | 030-004             | 1.17E+10        | 1.72E+07        | 1.20E+09        |                 | 2.60E+09        |                 |
| V | 035-002             | 4.26E+07        | 1.16E+07        | 2.72E+07        |                 |                 | 1.82E+05        |
| V | 037-006             |                 | 3.10E+07        | 2.28E+06        | 6.22E+08        |                 |                 |
| V | 037-010             | 4.81E+09        | 5.83E+06        | 2.80E+08        | 1.46E+07        |                 |                 |
| V | 037-016             |                 | 7.12E+05        | 7.31E+05        | 1.71E+09        | 1.46E+09        | 2.78E+09        |
| V | 042-001             | 1.11E+09        | 3.79E+07        | 1.62E+06        |                 |                 |                 |
| V | <b>Median</b>       | <b>1.62E+09</b> | <b>1.94E+06</b> | <b>1.89E+06</b> | <b>9.36E+08</b> | <b>2.72E+09</b> | <b>7.99E+08</b> |
|   | <b>Mean</b>         | <b>2.51E+09</b> | <b>1.12E+07</b> | <b>8.98E+07</b> | <b>1.82E+09</b> | <b>2.64E+09</b> | <b>3.05E+09</b> |
|   | <b># of samples</b> | <b>18</b>       | <b>20</b>       | <b>21</b>       | <b>16</b>       | <b>12</b>       | <b>6</b>        |

**C. leptum**

| Study drug       | Subject ID# | Baseline<br>(day 1) | Day 5    | End of<br>treatment<br>(day 10) | Day 25   | End of<br>study (day<br>40) | Sample<br>taken at<br>time of<br>suspected<br>recurrence<br>(REC) |
|------------------|-------------|---------------------|----------|---------------------------------|----------|-----------------------------|-------------------------------------------------------------------|
| Ridinilazole (R) | 002-013     | 8.71E+08            | 9.15E+07 | 2.21E+08                        | 6.21E+07 | 1.51E+08                    |                                                                   |
| R                | 007-002     | 3.03E+05            | 1.72E+04 | 1.37E+04                        | 1.07E+05 | 1.35E+05                    |                                                                   |
| R                | 009-002     | 1.51E+09            | 6.89E+05 | 6.64E+07                        | 3.77E+08 | 1.86E+09                    |                                                                   |
| R                | 017-003     | 8.42E+08            | 5.94E+07 | 1.38E+08                        |          | 1.47E+09                    |                                                                   |
| R                | 022-001     |                     | 7.90E+08 | 9.92E+08                        | 6.43E+08 | 2.30E+08                    |                                                                   |
| R                | 031-002     | 6.57E+07            |          | 2.47E+08                        | 2.74E+04 |                             | 9.85E+05                                                          |
| R                | 033-008     | 1.43E+08            | 1.04E+07 | 3.56E+06                        |          |                             | 5.05E+05                                                          |
| R                | 033-011     | 3.32E+05            | 3.38E+05 | 1.31E+08                        | 6.72E+08 | 3.87E+09                    |                                                                   |
| R                | 038-001     |                     | 1.28E+05 | 1.34E+08                        | 4.27E+08 | 8.95E+07                    |                                                                   |
| R                | 038-004     | 7.21E+05            | 1.45E+07 | 3.67E+05                        | 9.47E+06 |                             |                                                                   |
| R                | 042-003     |                     | 7.90E+07 | 2.51E+07                        |          |                             |                                                                   |
| R                | 045-003     | 5.55E+05            | 1.70E+05 | 1.18E+09                        | 1.70E+08 | 7.22E+07                    |                                                                   |
| R                | 002-007     | 6.89E+08            | 2.70E+05 | 5.51E+07                        | 1.74E+08 | 1.02E+09                    |                                                                   |
| R                | 002-009     | 1.16E+09            | 1.21E+07 | 5.06E+07                        | 1.24E+09 | 1.22E+09                    |                                                                   |
| R                | 002-012     | 3.04E+09            | 8.01E+09 | 6.14E+08                        |          |                             |                                                                   |
| R                | 009-005     | 3.48E+08            | 7.96E+05 | 2.63E+08                        | 1.30E+09 | 1.33E+08                    |                                                                   |
| R                | 009-007     | 1.75E+07            | 3.99E+08 | 5.40E+08                        | 4.08E+08 | 1.31E+09                    |                                                                   |
| R                | 019-001     | 1.11E+06            | 2.51E+06 | 3.10E+06                        | 1.60E+06 | 8.53E+05                    |                                                                   |
| R                | 019-003     | 5.61E+07            | 5.48E+07 | 1.84E+08                        | 2.14E+07 | 3.58E+07                    | 3.36E+08                                                          |
| R                | 019-006     | 3.90E+08            | 3.63E+08 | 7.64E+07                        | 4.99E+08 | 3.69E+08                    |                                                                   |
| R                | 019-007     | 7.81E+08            | 1.85E+08 | 5.64E+07                        | 8.49E+08 | 5.22E+08                    |                                                                   |
| R                | 019-009     | 4.47E+09            | 1.42E+08 | 2.25E+08                        | 2.49E+09 | 1.96E+09                    |                                                                   |
| R                | 021-001     | 7.68E+08            | 2.30E+08 | 8.26E+08                        | 6.91E+05 | 4.76E+08                    | 7.27E+08                                                          |
| R                | 029-002     | 2.07E+09            | 4.97E+08 | 9.21E+07                        | 2.20E+09 | 6.05E+08                    | 1.02E+09                                                          |
| R                | 030-005     | 1.47E+07            | 3.79E+07 | 2.30E+07                        | 3.28E+07 | 5.23E+07                    |                                                                   |
| R                | 031-001     | 1.21E+08            | 6.37E+07 | 3.93E+05                        |          |                             |                                                                   |
| R                | 032-003     | 2.67E+06            | 1.91E+08 | 4.93E+04                        |          |                             |                                                                   |

|                     |         |                 |                 |                 |                 |                 |                 |
|---------------------|---------|-----------------|-----------------|-----------------|-----------------|-----------------|-----------------|
| R                   | 033-009 | 3.74E+06        | 2.02E+08        | 1.04E+08        | 6.40E+08        | 2.71E+08        |                 |
| R                   | 035-001 | 5.83E+08        | 4.38E+08        | 2.58E+08        | 1.51E+09        | 5.80E+09        |                 |
| R                   | 036-001 | 6.42E+08        | 7.77E+06        | 3.86E+07        | 5.73E+07        | 6.35E+07        |                 |
| R                   | 037-004 | 1.16E+09        | 1.84E+08        | 3.81E+07        | 5.86E+08        | 1.18E+09        |                 |
| R                   | 037-008 | 2.88E+08        | 8.01E+08        | 1.42E+08        | 5.35E+08        |                 |                 |
| R                   | 037-014 |                 | 1.82E+08        | 9.12E+07        | 1.67E+05        | 4.57E+08        |                 |
| R                   | 037-015 | 9.75E+09        | 6.55E+08        | 2.92E+08        | 9.91E+08        | 1.20E+09        |                 |
| <b>Median</b>       |         | <b>5.83E+08</b> | <b>1.85E+08</b> | <b>9.16E+07</b> | <b>5.35E+08</b> | <b>4.99E+08</b> | <b>3.36E+08</b> |
| <b>Mean</b>         |         | <b>1.25E+09</b> | <b>5.76E+08</b> | <b>1.81E+08</b> | <b>7.12E+08</b> | <b>9.27E+08</b> | <b>6.96E+08</b> |
| <b># of samples</b> |         | <b>21</b>       | <b>22</b>       | <b>22</b>       | <b>19</b>       | <b>18</b>       | <b>3</b>        |
| V                   | 002-014 | 1.79E+05        | 3.55E+05        | 3.82E+06        |                 |                 |                 |
| V                   | 007-001 | 1.46E+09        | 3.08E+05        | 6.96E+04        | 1.16E+07        | 1.71E+09        |                 |
| V                   | 009-010 | 2.10E+08        | 1.92E+07        | 1.03E+07        | 7.01E+08        | 8.11E+08        |                 |
| V                   | 019-004 | 1.53E+09        | 1.58E+06        | 1.58E+06        | 1.66E+07        | 2.03E+08        |                 |
| V                   | 029-001 | 3.70E+06        | 2.06E+06        | 3.45E+04        | 1.51E+07        | 2.64E+04        |                 |
| V                   | 029-004 | 3.29E+08        | 5.25E+04        | 1.54E+05        | 6.32E+08        | 7.36E+08        |                 |
| V                   | 033-007 | 3.63E+07        | 8.04E+06        | 5.72E+06        | 5.22E+07        |                 |                 |
| V                   | 033-010 | 3.68E+07        | 9.10E+04        | 1.16E+05        | 1.29E+05        | 1.67E+05        | 7.83E+05        |
| V                   | 035-003 | 1.95E+08        | 5.24E+06        | 1.20E+07        | 2.01E+06        | 2.57E+07        | 2.21E+09        |
| V                   | 045-001 | 4.62E+06        | 5.45E+03        | 1.79E+04        |                 | 6.96E+08        |                 |
| V                   | 002-004 | 4.10E+09        | 8.59E+05        | 3.34E+05        | 2.86E+08        |                 | 7.33E+06        |
| V                   | 002-011 | 6.71E+07        | 3.37E+05        | 1.46E+05        | 2.61E+08        | 5.14E+08        |                 |
| V                   | 002-015 | 2.67E+08        | 1.10E+05        | 1.28E+05        |                 |                 | 3.37E+05        |
| V                   | 002-016 | 3.95E+06        | 6.03E+05        | 1.17E+05        |                 |                 |                 |
| V                   | 009-001 |                 |                 |                 |                 |                 |                 |
| V                   | 009-003 | 4.08E+07        | 1.20E+07        | 1.01E+06        | 1.30E+09        | 1.77E+08        | 2.16E+08        |
| V                   | 009-004 | 3.50E+07        | 4.08E+04        | 3.82E+04        | 8.13E+07        |                 |                 |
| V                   | 009-006 | 1.38E+09        | 2.46E+05        | 7.72E+04        | 5.97E+08        | 2.84E+07        |                 |
| V                   | 017-002 | 1.20E+08        | 1.69E+05        | 1.48E+05        | 5.58E+08        | 4.46E+09        |                 |
| V                   | 019-005 | 2.18E+08        | 1.12E+05        | 1.05E+05        | 7.37E+08        | 2.91E+08        |                 |
| V                   | 019-008 | 1.68E+09        | 2.34E+05        | 1.39E+06        | 2.13E+08        | 3.42E+07        |                 |

|                     |         |                 |                 |                 |                 |                 |                 |
|---------------------|---------|-----------------|-----------------|-----------------|-----------------|-----------------|-----------------|
| V                   | 019-010 |                 | 2.49E+06        | 1.00E+05        | 3.08E+07        | 3.16E+07        |                 |
| V                   | 019-013 | 2.00E+09        | 1.51E+05        | 5.30E+07        | 3.80E+08        | 7.28E+07        |                 |
| V                   | 019-014 | 3.43E+08        | 2.33E+05        | 3.47E+05        | 7.27E+06        | 1.40E+07        |                 |
| V                   | 021-003 | 3.76E+09        |                 | 3.95E+05        | 1.19E+09        |                 | 1.23E+09        |
| V                   | 030-004 | 4.34E+09        | 4.13E+06        | 1.13E+08        |                 | 7.25E+08        |                 |
| V                   | 035-002 | 1.95E+05        | 7.99E+04        | 8.71E+04        |                 |                 | 1.82E+05        |
| V                   | 037-006 |                 | 3.73E+06        | 7.36E+05        | 6.91E+05        |                 |                 |
| V                   | 037-010 | 3.81E+09        | 2.14E+05        | 3.92E+08        | 3.63E+06        |                 |                 |
| V                   | 037-016 |                 | 2.71E+05        | 1.90E+05        | 4.49E+09        | 1.35E+09        | 6.72E+09        |
| V                   | 042-001 | 4.56E+08        | 1.49E+07        | 4.42E+05        |                 |                 |                 |
| V                   | 042-002 | 7.86E+07        | 2.08E+05        | 1.08E+05        | 2.14E+09        |                 |                 |
| <b>Median</b>       |         | <b>3.05E+08</b> | <b>2.40E+05</b> | <b>1.90E+05</b> | <b>3.33E+08</b> | <b>1.77E+08</b> | <b>1.12E+08</b> |
| <b>Mean</b>         |         | <b>1.26E+09</b> | <b>2.06E+06</b> | <b>2.68E+07</b> | <b>7.67E+08</b> | <b>7.00E+08</b> | <b>1.36E+09</b> |
| <b># of samples</b> |         | <b>18</b>       | <b>20</b>       | <b>21</b>       | <b>16</b>       | <b>11</b>       | <b>6</b>        |

**Prevotella**

| <b>Study drug</b> | <b>Subject ID#</b> | <b>Baseline<br/>(day 1)</b> | <b>Day 5</b> | <b>End of<br/>treatment<br/>(day 10)</b> | <b>Day 25</b> | <b>End of<br/>study (day<br/>40)</b> | <b>Sample<br/>taken at<br/>time of<br/>suspected<br/>recurrence<br/>(REC)</b> |
|-------------------|--------------------|-----------------------------|--------------|------------------------------------------|---------------|--------------------------------------|-------------------------------------------------------------------------------|
| Ridinilazole (R)  | 002-013            | 1.44E+10                    | 5.66E+09     | 6.31E+09                                 | 8.28E+09      | 8.07E+09                             |                                                                               |
| R                 | 007-002            | 2.05E+06                    | 8.49E+03     | 1.86E+04                                 | 2.31E+05      | 1.26E+06                             |                                                                               |
| R                 | 009-002            | 2.58E+09                    | 9.91E+06     | 2.54E+10                                 | 6.97E+08      | 7.75E+08                             |                                                                               |
| R                 | 017-003            | 1.80E+10                    | 8.94E+09     | 1.59E+10                                 |               | 1.12E+10                             |                                                                               |
| R                 | 022-001            |                             | 9.21E+09     | 1.08E+10                                 | 2.88E+09      | 2.77E+08                             |                                                                               |
| R                 | 031-002            | 1.99E+10                    |              | 1.91E+10                                 | 7.81E+07      |                                      | 9.14E+07                                                                      |
| R                 | 033-008            | 8.96E+09                    | 1.94E+07     | 2.72E+06                                 | 2.25E+06      | 2.14E+10                             | 2.47E+06                                                                      |
| R                 | 033-011            | 6.45E+06                    | 7.93E+06     | 2.31E+10                                 | 3.70E+10      | 2.43E+09                             |                                                                               |
| R                 | 038-001            |                             | 2.58E+06     | 2.36E+09                                 | 1.47E+10      | 2.23E+10                             |                                                                               |
| R                 | 038-004            | 7.54E+06                    | 7.66E+05     | 5.69E+05                                 | 6.67E+05      |                                      |                                                                               |
| R                 | 042-003            |                             | 8.19E+09     | 6.06E+09                                 |               |                                      |                                                                               |
| R                 | 045-003            | 1.90E+06                    | 6.66E+06     | 1.03E+07                                 | 6.71E+06      | 6.22E+06                             |                                                                               |
| R                 | 002-007            | 5.69E+08                    | 2.03E+06     | 1.14E+10                                 | 2.82E+08      | 7.85E+08                             |                                                                               |
| R                 | 002-009            | 5.25E+09                    | 4.01E+08     | 2.66E+08                                 | 3.04E+09      | 5.69E+09                             |                                                                               |
| R                 | 002-012            | 1.21E+10                    | 2.42E+10     | 1.34E+10                                 |               |                                      |                                                                               |
| R                 | 009-005            | 7.46E+05                    | 1.27E+05     | 4.51E+05                                 | 1.48E+06      | 1.02E+10                             |                                                                               |
| R                 | 009-007            | 2.09E+07                    | 7.28E+09     | 3.05E+09                                 | 8.37E+09      | 1.47E+09                             |                                                                               |
| R                 | 019-001            | 1.63E+09                    | 4.28E+09     | 5.01E+09                                 | 8.57E+06      | 1.31E+07                             |                                                                               |
| R                 | 019-003            | 9.31E+08                    | 3.39E+09     | 5.27E+09                                 | 2.85E+09      | 1.91E+09                             | 1.25E+10                                                                      |
| R                 | 019-006            | 9.97E+08                    | 1.46E+09     | 4.16E+09                                 | 4.51E+09      | 8.59E+09                             |                                                                               |
| R                 | 019-007            | 1.44E+10                    | 7.71E+09     | 6.46E+09                                 | 1.62E+10      | 1.80E+10                             |                                                                               |
| R                 | 019-009            | 2.95E+09                    | 6.17E+09     | 6.53E+09                                 | 1.15E+10      | 1.89E+10                             |                                                                               |
| R                 | 021-001            | 3.36E+09                    | 1.63E+09     | 5.42E+09                                 | 4.21E+06      | 4.49E+09                             | 2.18E+09                                                                      |
| R                 | 029-002            | 5.84E+09                    | 3.55E+09     | 1.18E+09                                 | 8.23E+09      | 1.13E+09                             | 6.41E+09                                                                      |
| R                 | 030-005            | 5.96E+09                    | 1.57E+10     | 7.78E+09                                 | 3.15E+09      | 3.76E+08                             |                                                                               |
| R                 | 031-001            | 7.95E+09                    | 9.12E+09     | 7.67E+09                                 |               |                                      |                                                                               |
| R                 | 032-003            | 3.44E+09                    | 1.17E+10     | 1.99E+06                                 | 4.37E+06      | 7.88E+07                             |                                                                               |

|                     |         |                 |                 |                 |                 |                 |                 |
|---------------------|---------|-----------------|-----------------|-----------------|-----------------|-----------------|-----------------|
| R                   | 033-009 | 5.24E+07        | 2.14E+10        | 8.49E+09        | 3.77E+10        | 2.48E+10        |                 |
| R                   | 035-001 | 2.58E+05        | 1.55E+06        | 1.69E+06        | 2.52E+06        | 1.26E+10        |                 |
| R                   | 036-001 | 2.49E+06        | 2.16E+05        | 4.38E+06        | 3.79E+06        | 1.02E+10        |                 |
| R                   | 037-004 | 5.01E+09        | 1.29E+07        | 2.55E+07        | 7.83E+06        | 7.13E+06        |                 |
| R                   | 037-008 | 1.66E+06        | 1.81E+06        | 1.32E+06        | 1.18E+06        |                 |                 |
| R                   | 037-014 |                 | 8.21E+08        | 2.06E+08        | 4.20E+05        | 3.08E+09        |                 |
| R                   | 037-015 | 4.97E+10        | 1.44E+09        | 1.06E+10        | 2.04E+09        | 2.75E+09        |                 |
| <b>Median</b>       |         | <b>2.95E+09</b> | <b>2.51E+09</b> | <b>4.59E+09</b> | <b>1.16E+09</b> | <b>3.08E+09</b> | <b>2.18E+09</b> |
| <b>Mean</b>         |         | <b>5.72E+09</b> | <b>5.47E+09</b> | <b>4.41E+09</b> | <b>4.89E+09</b> | <b>6.58E+09</b> | <b>7.05E+09</b> |
| <b># of samples</b> |         | <b>21</b>       | <b>22</b>       | <b>22</b>       | <b>20</b>       | <b>19</b>       | <b>3</b>        |
| V                   | 002-014 | 2.82E+06        | 7.13E+06        | 5.41E+08        |                 |                 |                 |
| V                   | 007-001 | 2.51E+09        | 5.91E+05        | 3.86E+05        | 2.70E+09        | 4.41E+09        |                 |
| V                   | 009-010 | 1.59E+10        | 6.15E+07        | 1.92E+07        | 3.07E+07        | 1.21E+09        |                 |
| V                   | 019-004 | 3.50E+09        | 1.15E+07        | 6.34E+07        |                 |                 |                 |
| V                   | 029-001 | 3.87E+07        | 1.09E+05        | 5.36E+04        | 1.06E+06        | 4.64E+04        |                 |
| V                   | 029-004 | 1.97E+09        | 4.80E+05        | 1.45E+06        | 6.77E+09        | 1.37E+10        |                 |
| V                   | 033-007 | 2.97E+08        | 6.80E+09        | 3.48E+09        | 1.81E+09        |                 |                 |
| V                   | 033-010 | 4.72E+09        | 1.55E+06        | 2.56E+06        |                 |                 | 6.41E+06        |
| V                   | 035-003 | 3.85E+09        | 4.50E+07        | 9.05E+07        | 5.35E+06        | 5.68E+08        | 1.95E+10        |
| V                   | 045-001 | 5.04E+08        | 8.90E+04        | 5.91E+04        |                 | 4.40E+09        |                 |
| V                   | 002-004 | 6.23E+09        | 1.51E+06        | 5.25E+06        | 1.33E+06        |                 | 1.57E+06        |
| V                   | 002-011 | 2.42E+08        | 5.41E+06        | 4.63E+05        | 3.25E+08        | 1.49E+09        |                 |
| V                   | 002-015 | 5.18E+09        | 5.63E+06        | 7.99E+06        |                 |                 | 1.34E+07        |
| V                   | 002-016 | 1.90E+08        | 2.22E+07        | 1.80E+07        |                 |                 |                 |
| V                   | 009-001 | 3.61E+06        | 3.40E+06        | 8.37E+06        | 3.65E+06        | 1.71E+07        |                 |
| V                   | 009-003 | 3.54E+08        | 2.59E+07        | 6.21E+06        | 2.33E+09        | 1.05E+09        | 4.78E+09        |
| V                   | 009-004 | 1.03E+09        | 2.77E+05        | 2.12E+05        | 1.71E+09        |                 |                 |
| V                   | 009-006 | 2.10E+09        | 4.33E+05        | 1.21E+06        | 2.77E+06        | 6.06E+06        |                 |
| V                   | 017-002 | 6.56E+08        | 2.10E+07        | 6.99E+06        | 3.88E+09        | 1.73E+10        |                 |
| V                   | 019-005 | 3.81E+09        | 1.85E+06        | 1.11E+06        | 4.34E+09        | 5.41E+09        |                 |
| V                   | 019-008 | 9.31E+09        | 3.85E+06        | 6.25E+06        | 8.19E+08        | 1.30E+10        |                 |



|       |                     |                 |                 |                 |                 |                 |                 |
|-------|---------------------|-----------------|-----------------|-----------------|-----------------|-----------------|-----------------|
| V     | 019-010             |                 | 3.16E+07        | 5.00E+05        | 1.22E+09        | 1.03E+10        |                 |
| V     | 019-013             | 1.39E+10        | 2.69E+06        | 5.16E+09        | 8.29E+06        | 2.54E+10        |                 |
| V     | 019-014             | 9.52E+08        | 1.07E+06        | 1.66E+06        | 1.52E+08        | 3.15E+08        |                 |
| V     | 021-003             | 8.17E+09        |                 | 1.06E+10        | 1.91E+10        |                 | 1.97E+10        |
| V     | 030-004             | 3.75E+10        | 2.19E+07        | 9.40E+06        |                 | 2.56E+10        |                 |
| V     | 035-002             | 2.88E+08        | 1.36E+08        | 1.41E+08        |                 |                 | 2.79E+06        |
| V     | 037-006             |                 | 1.89E+07        | 8.31E+06        | 3.12E+06        |                 |                 |
| V     | 037-010             | 8.27E+09        | 5.76E+09        | 6.28E+09        | 3.26E+07        |                 |                 |
| V     | 037-016             |                 | 2.84E+06        | 3.43E+06        | 4.01E+09        | 2.41E+09        | 1.54E+10        |
| V     | 042-001             | 1.16E+09        | 4.02E+07        | 2.64E+09        |                 |                 |                 |
| V     | 042-002             | 4.28E+08        | 1.99E+07        | 5.12E+06        | 8.29E+09        |                 |                 |
| <hr/> |                     |                 |                 |                 |                 |                 |                 |
|       | <b>Median</b>       | <b>1.16E+09</b> | <b>5.63E+06</b> | <b>6.62E+06</b> | <b>8.19E+08</b> | <b>3.91E+09</b> | <b>2.40E+09</b> |
|       | <b>Mean</b>         | <b>5.25E+09</b> | <b>2.92E+08</b> | <b>1.13E+09</b> | <b>2.72E+09</b> | <b>8.52E+09</b> | <b>6.66E+09</b> |
|       | <b># of samples</b> | <b>19</b>       | <b>21</b>       | <b>22</b>       | <b>17</b>       | <b>12</b>       | <b>6</b>        |

## Normal Stools

| <u>Sample</u> | <u>Bacteroides</u> | <u>Eubacteria</u> | <u>Enterobacteriaceae</u> | <u>C. coccoides</u> | <u>C. leptum</u> | <u>Prevotella</u> |
|---------------|--------------------|-------------------|---------------------------|---------------------|------------------|-------------------|
| 76A           | 1.31E+07           | 2.64E+09          | 2.06E+06                  | 5.60E+09            | 1.92E+09         | 7.56E+06          |
| 30            | 4.60E+10           | 4.70E+10          | 4.75E+06                  | 8.11E+09            | 4.68E+09         | 3.28E+10          |
| 6A            | 1.15E+10           | 1.32E+10          | 7.15E+06                  | 2.50E+09            | 1.49E+09         | 7.70E+09          |
| 87A           | 7.97E+09           | 2.61E+10          | 3.78E+06                  | 1.05E+10            | 2.96E+09         | 6.65E+09          |
| 66A           | 2.94E+10           | 2.44E+10          | 1.29E+08                  | 5.99E+09            | 4.46E+09         | 1.67E+10          |
| 25            | 9.82E+09           | 1.50E+10          | 1.16E+08                  | 3.32E+09            | 2.21E+09         | 6.25E+09          |
| 39            | 5.56E+10           | 6.39E+10          | 9.66E+06                  | 2.52E+09            | 1.61E+09         | 4.82E+10          |
| 13A           | 2.42E+10           | 3.84E+10          | 7.85E+05                  | 1.03E+10            | 4.86E+09         | 1.65E+10          |
| 105A          | 2.30E+10           | 2.99E+10          | 2.98E+06                  | 5.90E+09            | 4.07E+09         | 2.38E+10          |
| 99A           | 5.07E+09           | 4.22E+09          | 1.33E+08                  | 1.01E+09            | 1.31E+08         | 2.61E+09          |
| 134           | 8.14E+09           | 6.78E+09          | 4.67E+07                  | 4.77E+09            | 2.44E+09         | 4.74E+09          |
| 137           | 7.32E+09           | 4.88E+07          | 1.28E+06                  | 2.73E+08            | 8.10E+07         | 1.44E+09          |
| 140           | 6.55E+09           | 2.02E+10          | 9.52E+05                  | 6.49E+09            | 4.38E+09         | 1.26E+10          |
| 143           | 2.29E+10           | 1.51E+10          | 2.25E+07                  | 7.03E+09            | 1.26E+09         | 1.30E+10          |
| <b>Median</b> | <b>1.06E+10</b>    | <b>1.76E+10</b>   | <b>5.95E+06</b>           | <b>5.75E+09</b>     | <b>2.33E+09</b>  | <b>1.02E+10</b>   |
| <b>Mean</b>   | <b>1.84E+10</b>    | <b>2.19E+10</b>   | <b>3.43E+07</b>           | <b>5.31E+09</b>     | <b>2.61E+09</b>  | <b>1.38E+10</b>   |
